# Supplementary material for: Metabolic engineering of Escherichia coli for production of mixed isoprenoid alcohols and their derivatives
Source: Biotechnol Biofuels. 2018 Jul 24;11:210. doi: 10.1186/s13068-018-1210-0 (PMC6058358; doi:10.1186/s13068-018-1210-0)
Supplement: Supplementary file 1 — Additional file 1: Table S1. Primers, plasmids and bacterial strains used in this study. Table S2. Time course analysis of oxidation of farnesol to farnesal in E. coli DH5α-YjgB. Figure S1. GC-FID and GC-MS profile of standard isoprenoid-based alcohols and their derivatives. Figure S2. Comparison of cell growth of the strains NA-MBF2.0, NAK-MBF2.0, NA-MBF1.0, and NAK-MBF1.0. Figure S3. Comparison of cell growth of the strains NA-MBF1.1, NA-MBF1.2, NA-MBF1.1a and NA-MBF1.2a. Figure S4. Percent composition of isoprenoid mixtures obtained from the strains NA-MBF1.1, NA-MBF1.2, NA-MBF1.1a and NA-MBF1.2a. Figure S5. GC-FID standard curves of isoprenoid alcohols and their derivatives. [file 13068_2018_1210_MOESM1_ESM.docx]

**Additional File 1**

**Metabolic engineering of *Escherichia* *coli* for production of mixed isoprenoid alcohols and their derivatives**

Bakht Zadaa,1, Chonglong Wangb,2, Ji-Bin Parka, Seong-Hee Jeonga, Ju-Eon Parka, Hawaibam Birla Singha, Seon-Won Kima*

aDivision of Applied Life Science (BK21 Plus Program), PMBBRC, Gyeongsang National University, Jinju 660‑701, Republic of Korea

bSchool of Biology and Basic Medical Sciences, Soochow University, Suzhou, People's Republic of China

1Both authors contributed equally to this work.

E-mail: bakhtqau@gmail.com (B.Z.), clwang@suda.edu.cn (C.W.), [jbjnas@hanmail.net](mailto:jbjnas@hanmail.net)

(J.B.P.), [jshe89@nate.com](mailto:jshe89@nate.com) (S.H.J.), [parkwndjs@naver.com](mailto:parkwndjs@naver.com) (J.E.P.),

birla.hawaibam@gmail.com (H.B.S.)

* Corresponding author: Prof. Seon-Won Kim

E-mail: swkim@gsnu.ac.kr (SW Kim), Tel.: +82 55 772 1362, Fax: +82 55 759 9363.

**Table S1.** Primers, plasmids, and bacterial strains used in this study.

**Table S2.** Time course analysis of oxidation of farnesol to farnesal in strain DH5α-YjgB.

**Figure S1.** GC-FID and GC-MS profile of standard isoprenoid-based alcohols and their derivatives.

**Figure S2.** Comparison of the cell growth of strains NA-MBF2.0, NAK-MBF2.0, NA-MBF1.0, and NAK-MBF1.0.

**Figure S3.** Comparison of the cell growth of strains NA-MBF1.1, NA-MBF1.2, NA-MBF1.1a, and NA-MBF1.2a

**Figure S4.** Percent composition of isoprenoid biofuels obtained from strains NA-MBF1.1, NA-MBF1.2, NA-MBF1.1a, and NA-MBF1.2a.

**Figure S5.** GC-FID standard curves of isoprenoid-based alcohols and their derivatives.

| **Names** | **Descriptions** | **References** |
| --- | --- | --- |
| **Primersa** |  |  |
| IspA-F | CTAGGAGCTCAGCCCTAAGGAACCAATATGGACTTTCCGCAGCAAC | This study |
| IspA-R | TGAGGTACCTTATTTATTACGCTGGATGATGTAG | This study |
| NudB-F1 | CTGGATCCTTTAAGAAGGAGATATACATATGAAGGATAAAGTGTATAAGCGTCC | This study |
| NudB-R1 | CCCAAGCTTAGGCAGCGTTAATTACAAACTG | This study |
| IspA*-F | GAGGTACCAACAATAATCTCGTATAGTATGGACTTTCCGCAGCAAC | This study |
| IspA*-R | CTGGATCCTTATTTATTACGCTGGATGATGTAG | This study |
| NudB-F2 | CATCCATGGTTTAAGAAGGAGATATACATATGAAGGATAAAGTGTATAAGCGTCC | This study |
| NudB-R2 | CATGGAGCTCTTAGGCAGCGTTAATTACAAACTG | This study |
| AphA-F | TATCGTCGACAAGTCATTCGGGGCCAATTTATGCGCAAGATCACACAGGC | This study |
| AphA-R | CCCAAGCTTAGTATTCTGAATTGACGATCACCTC | This study |
| Idi-F | ACGGATCCTGAGGAGGTAACGTATGCAAACGGAACACGTCATTTTA | This study |
| Idi-R | TATCGTCGACTCTAAGATCTTATTTAAGCTGGGTAAATGCAG | This study |
| AdhE-F | TACGAATTCAGGAGGTAATAATAATGGCTGTTACTAATGTCGC | This study |
| AdhE-R | ACGGATCCTAAAGCGGATTTTTTCGC | This study |
| **Plasmids** |  |  |
| pSTV28 | P*lac* expression vector, pACYC184 origin, lacZ, Cmr | Takara Co., Ltd |
| pSNA | pSTV28 containing *mvaE* and *mvaS* of *E. faecalis,* *mvaK1, mvaK2,* and *mvaD* of *S. pneumoniae,* and *idi* of *E. coli* | [[1](#_ENREF_1)] |
| pSTV28K | P*lac* expression vector, pACYC184 origin, lacZ, Kmr | [[2](#_ENREF_2)] |
| pSNAK | pSTV28K containing *mvaE* and *mvaS* from *E. faecalis*, *mvaK1, mvaK2*, and *mvaD* from *S. pneumoniae*, and idi from *E. coli* | [[2](#_ENREF_2)] |
| pTrc99A | P*trc* expression vector, pBR322 origin, lacIq, Ampr | [[3](#_ENREF_3)] |
| pT-SBL | pTrc99A vector containing *ispA* from *E. coli* | This study |
| pT-MBF1.0 | pTrc99A vector containing *ispA* and *nudB* from *E. coli* | This study |
| pT-MBF2.0 | pTrc99A vector containing *ispA** and *nudB* from *E. coli* | This study |
| pT-MBF1.1 | pTrc99A vector containing *nudB* and *ispA* from *E. coli* | This study |
| pT-MBF1.2 | pTrc99A vector containing *nudB, ispA* and *aphA* from *E. coli* | This study |
| pT-MBF1.1a | pTrc99A vector containing *nudB, ispA* and *idi* from *E. coli* | This study |
| pT-MBF1.2a | pTrc99A vector containing *nudB, ispA*, *idi* and *aphA* from *E. coli* | This study |
| pT-YahK | pTrc99A vector containing *yahK* from *E. coli* | [[2](#_ENREF_2)] |
| pT-YddN | pTrc99A vector containing *yddN* from *E. coli* | [[2](#_ENREF_2)] |
| pT-AdhE | pTrc99A vector containing *adhE* from *E. coli* | This study |
| pT-YjgB | pTrc99A vector containing *yjgB* from *E. coli* | [[2](#_ENREF_2)] |
| **Strains** |  | [[2](#_ENREF_2)] |
| MG1655 | *E. coli* K-12; F- lambda-, ilvG-, rfb-50, rph-1 | ATCC 700926b |
| DH5α | *E. coli* K-12; F–, Φ80lacZΔM15, Δ(lacZYA-argF)U169, deoR, recA1, endA1, hsdR17(rK–, mK+) phoA, supE44, λ–,thi-1 | ATCC 98040 |
| NA-MBF1.0 | *E. coli* DH5α harboring pT-MBF1.0 and pSNA | This study |
| NAK-MBF1.0 | *E. coli* DH5α harboring pT-MBF2.0 and pSNA | This study |
| NA-MBF2.0 | *E. coli* DH5α harboring pT-MBF1.0 and pSNAK | This study |
| NAK-MBF2.0 | *E. coli* DH5α harboring pT-MBF2.0 and pSNAK | This study |
| NA-MBF1.1 | *E. coli* DH5α harboring pT-MBF1.1 and pSNA | This study |
| NA-MBF1.2 | *E. coli* DH5α harboring pT-MBF1.2 and pSNA | This study |
| NA-MBF1.1a | *E. coli* DH5α harboring pT-MBF1.1a and pSNA | This study |
| NA-MBF1.2a | *E. coli* DH5α harboring pT-MBF1.2a and pSNA | This study |
| DH5α-Trc | *E. coli* DH5α harboring pTrc99A | This study |
| DH5α -YjgB | *E. coli* DH5α harboring pT-YjgB | This study |
| DH5α -Yahk | *E. coli* DH5α harboring pT-Yahk | This study |
| DH5α -Yddn | *E. coli* DH5α harboring pT-YddN | This study |
| DH5α -Adhe | *E. coli* DH5α harboring pT-AdhE | This study |
| MG*ΔYjgB* | MG1655 *ΔYjgB* | [[2](#_ENREF_2)] |

**Table S1.**

**Primers, plasmids, and bacterial strains used in this study.**

aRestriction enzyme sites are underlined.

bATCC, American type culture collection.

**Table S2.**

**Time course analysis of oxidation of farnesol to farnesal in strain DH5α-YjgB.**

| Time (h) | Farnesol (mg/L) | Farnesal (mg/L) | Total (mg/L) |
| --- | --- | --- | --- |
| 12 | 979 ± 5.6 | 10 ± 1.5 | 989 ± 6.6 |
| 24 | 956 ± 6.3 | 28 ± 2.6 | 984 ± 8.9 |
| 36 | 896 ± 9.1 | 89 ± 7.2 | 985 ± 16.3 |
| 48 | 873 ± 7.1 | 116 ± 4.2 | 989 ± 11.3 |

*Farnesol was fed in a two-phase culture of strain DH5α-YjgB at a concentration of 1 g/L. The culture was initially induced with 0.2 mM IPTG and incubated at 30°C with 250 rpm shaking in a rotary shaker for 48 h. Decane phase was collected at 12 h intervals and subsequently subjected to GC for analysis of compositional variations between farnesol and farnesal. Results are presented as the means of the triplicate experiments (M ± SD).

**
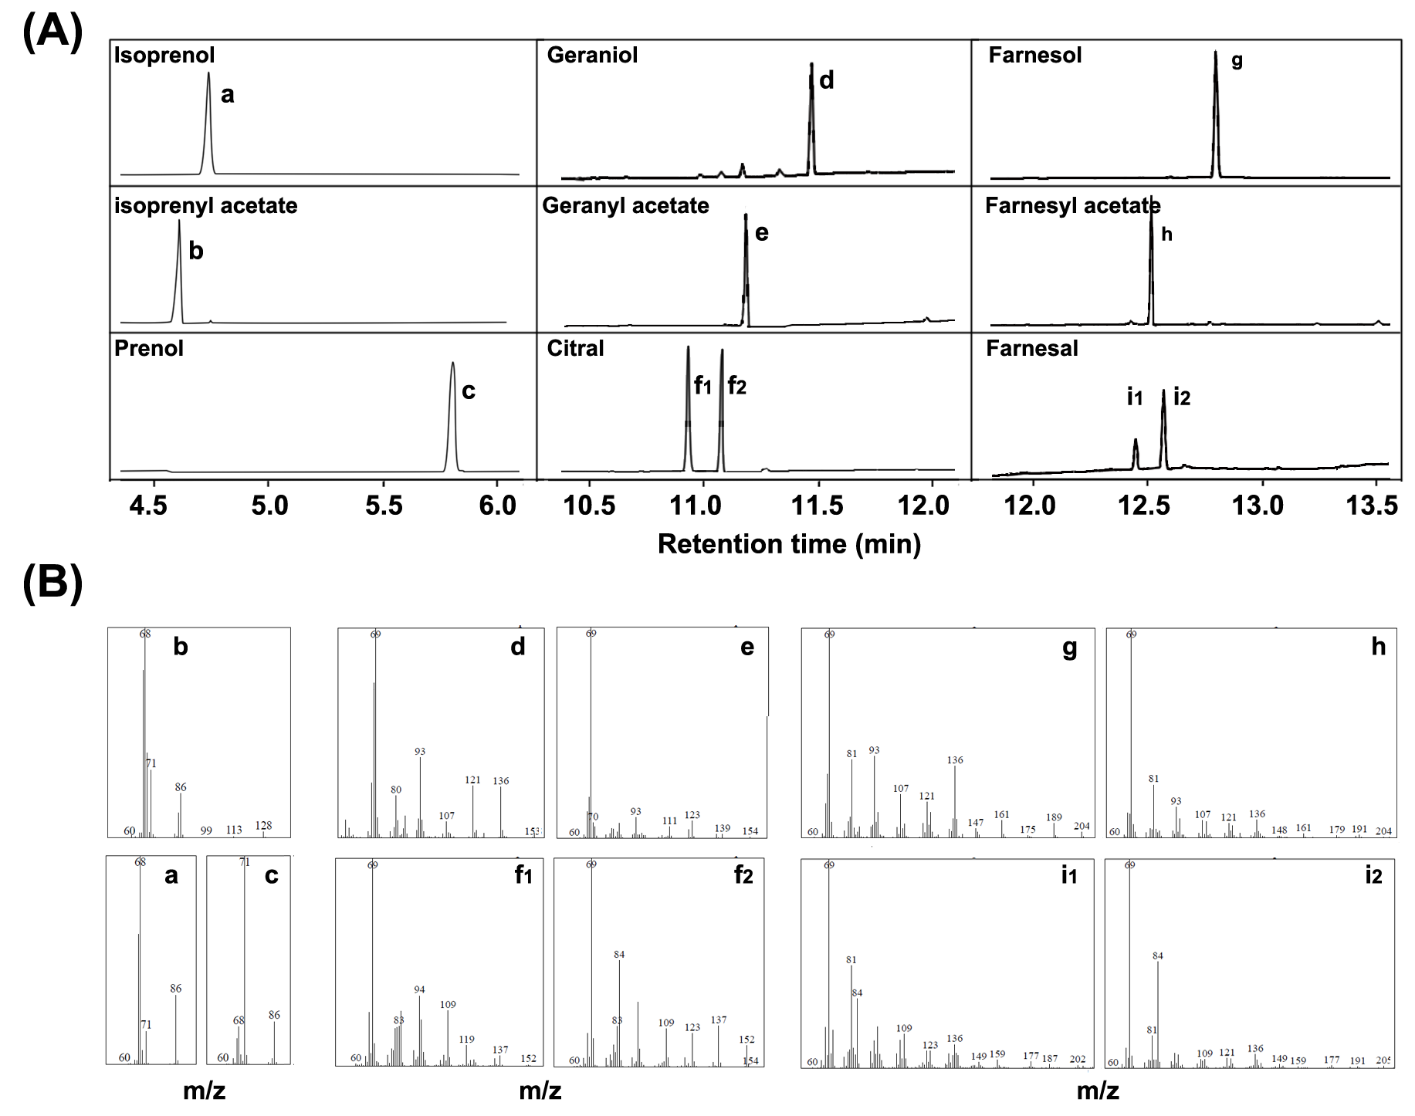
Figure S1.**

**GC-FID and GC-MS profile of standard isoprenoid alcohols and their derivatives.** GC chromatograms **(A)** and mass spectra **(B)** of standard isoprenoid compounds. Standard citral exists as isomers, *E*-citral (f1) and *Z*-citral (f2). Standard farnesal also exists as isomers of *Z*,*E*-farnesal (i1) and *E*,*E*-farnesal (i2).


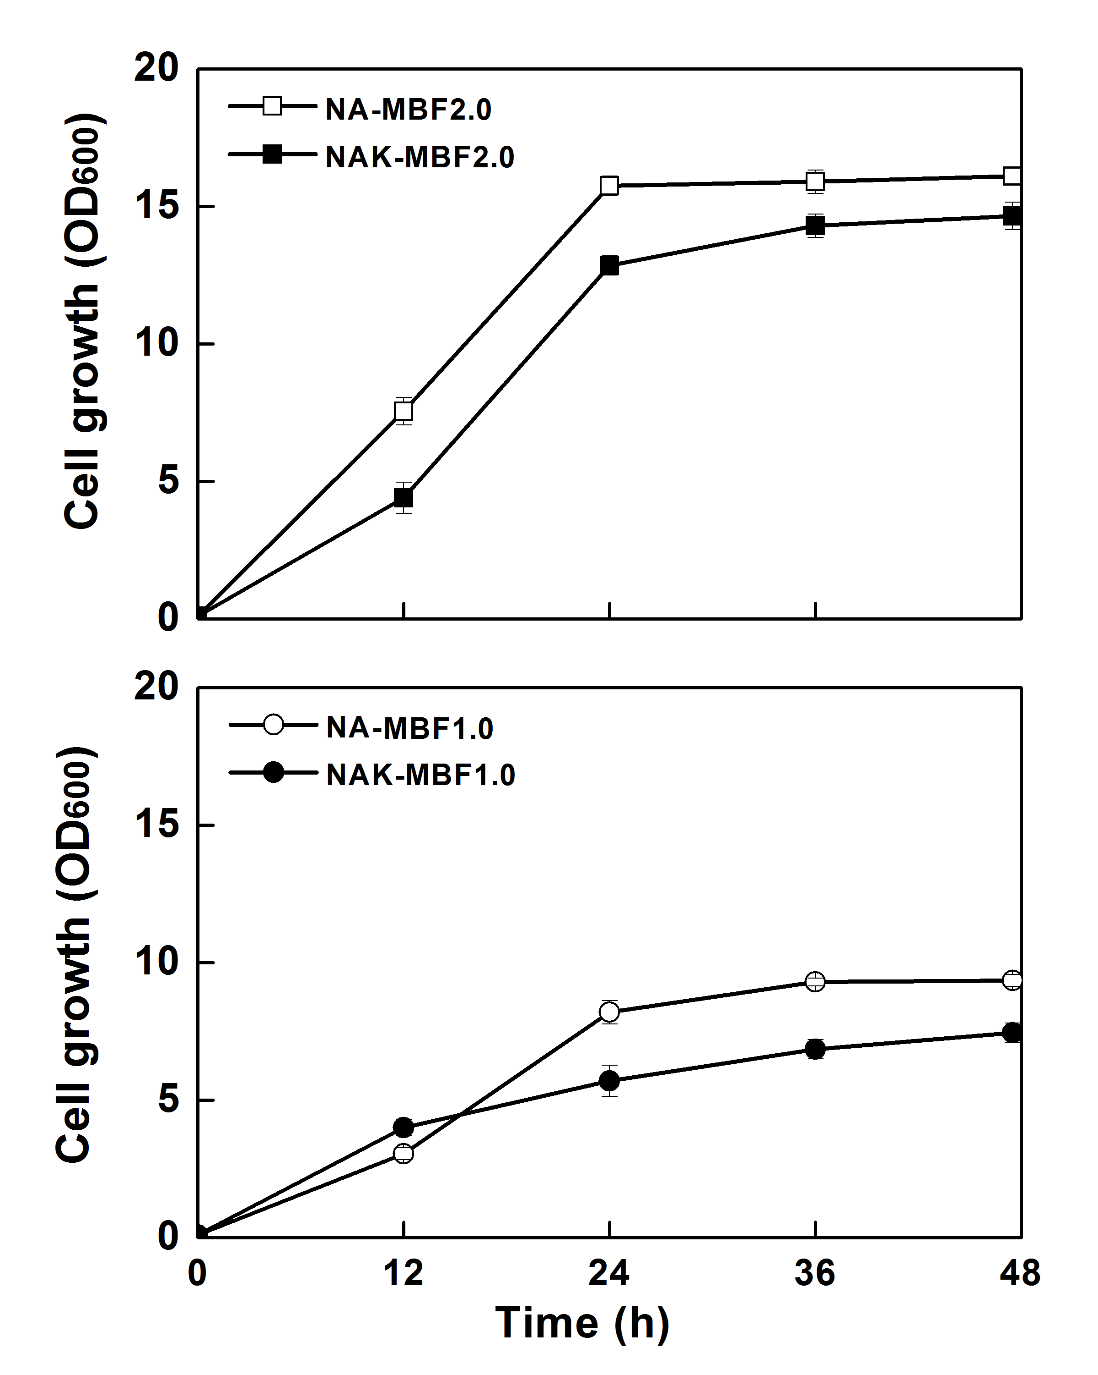


**Figure S2.**

**Comparison of cell growth of strains NA-MBF2.0 and NAK-MBF2.0 (upper panel) and the strains NA-MBF1.0 and NAK-MBF1.0 (lower panel).** Strains NA-MBF2.0 and NAK-MBF2.0 are *E. coli* DH5α harboring pSNA and pSNAK, respectively, in addition to pT-MBF2.0; strains NA-MBF1.0 and NAK-MBF1.0 harbor pT-MBF1.0 instead of pT-MBF1.0. Strains were cultured at 30°C for 48 h in 2YT medium containing 2.0% (v/v) glycerol and were initially induced with 0.5 mM IPTG. Error bars represent the range from three independent experiments.

**

Figure S3.**

**Comparison of cell growth of strains NA-MBF1.1, NA-MBF1.2, NA-MBF1.1a, and NA-MBF1.2a harboring NA-MBF1.1, NA-MBF1.2, NA-MBF1.1a, and NA-MBF1.2a, respectively, in addition to pSNA.** The dotted line represents the cell growth of strain NA-MBF1.0. The strains were cultured at 30°C for 48 h in 2YT medium containing 2.0% (v/v) glycerol and were initially induced with 0.5 mM IPTG. The error bars represent the range from three independent experiments.

**Figure S4.**

**
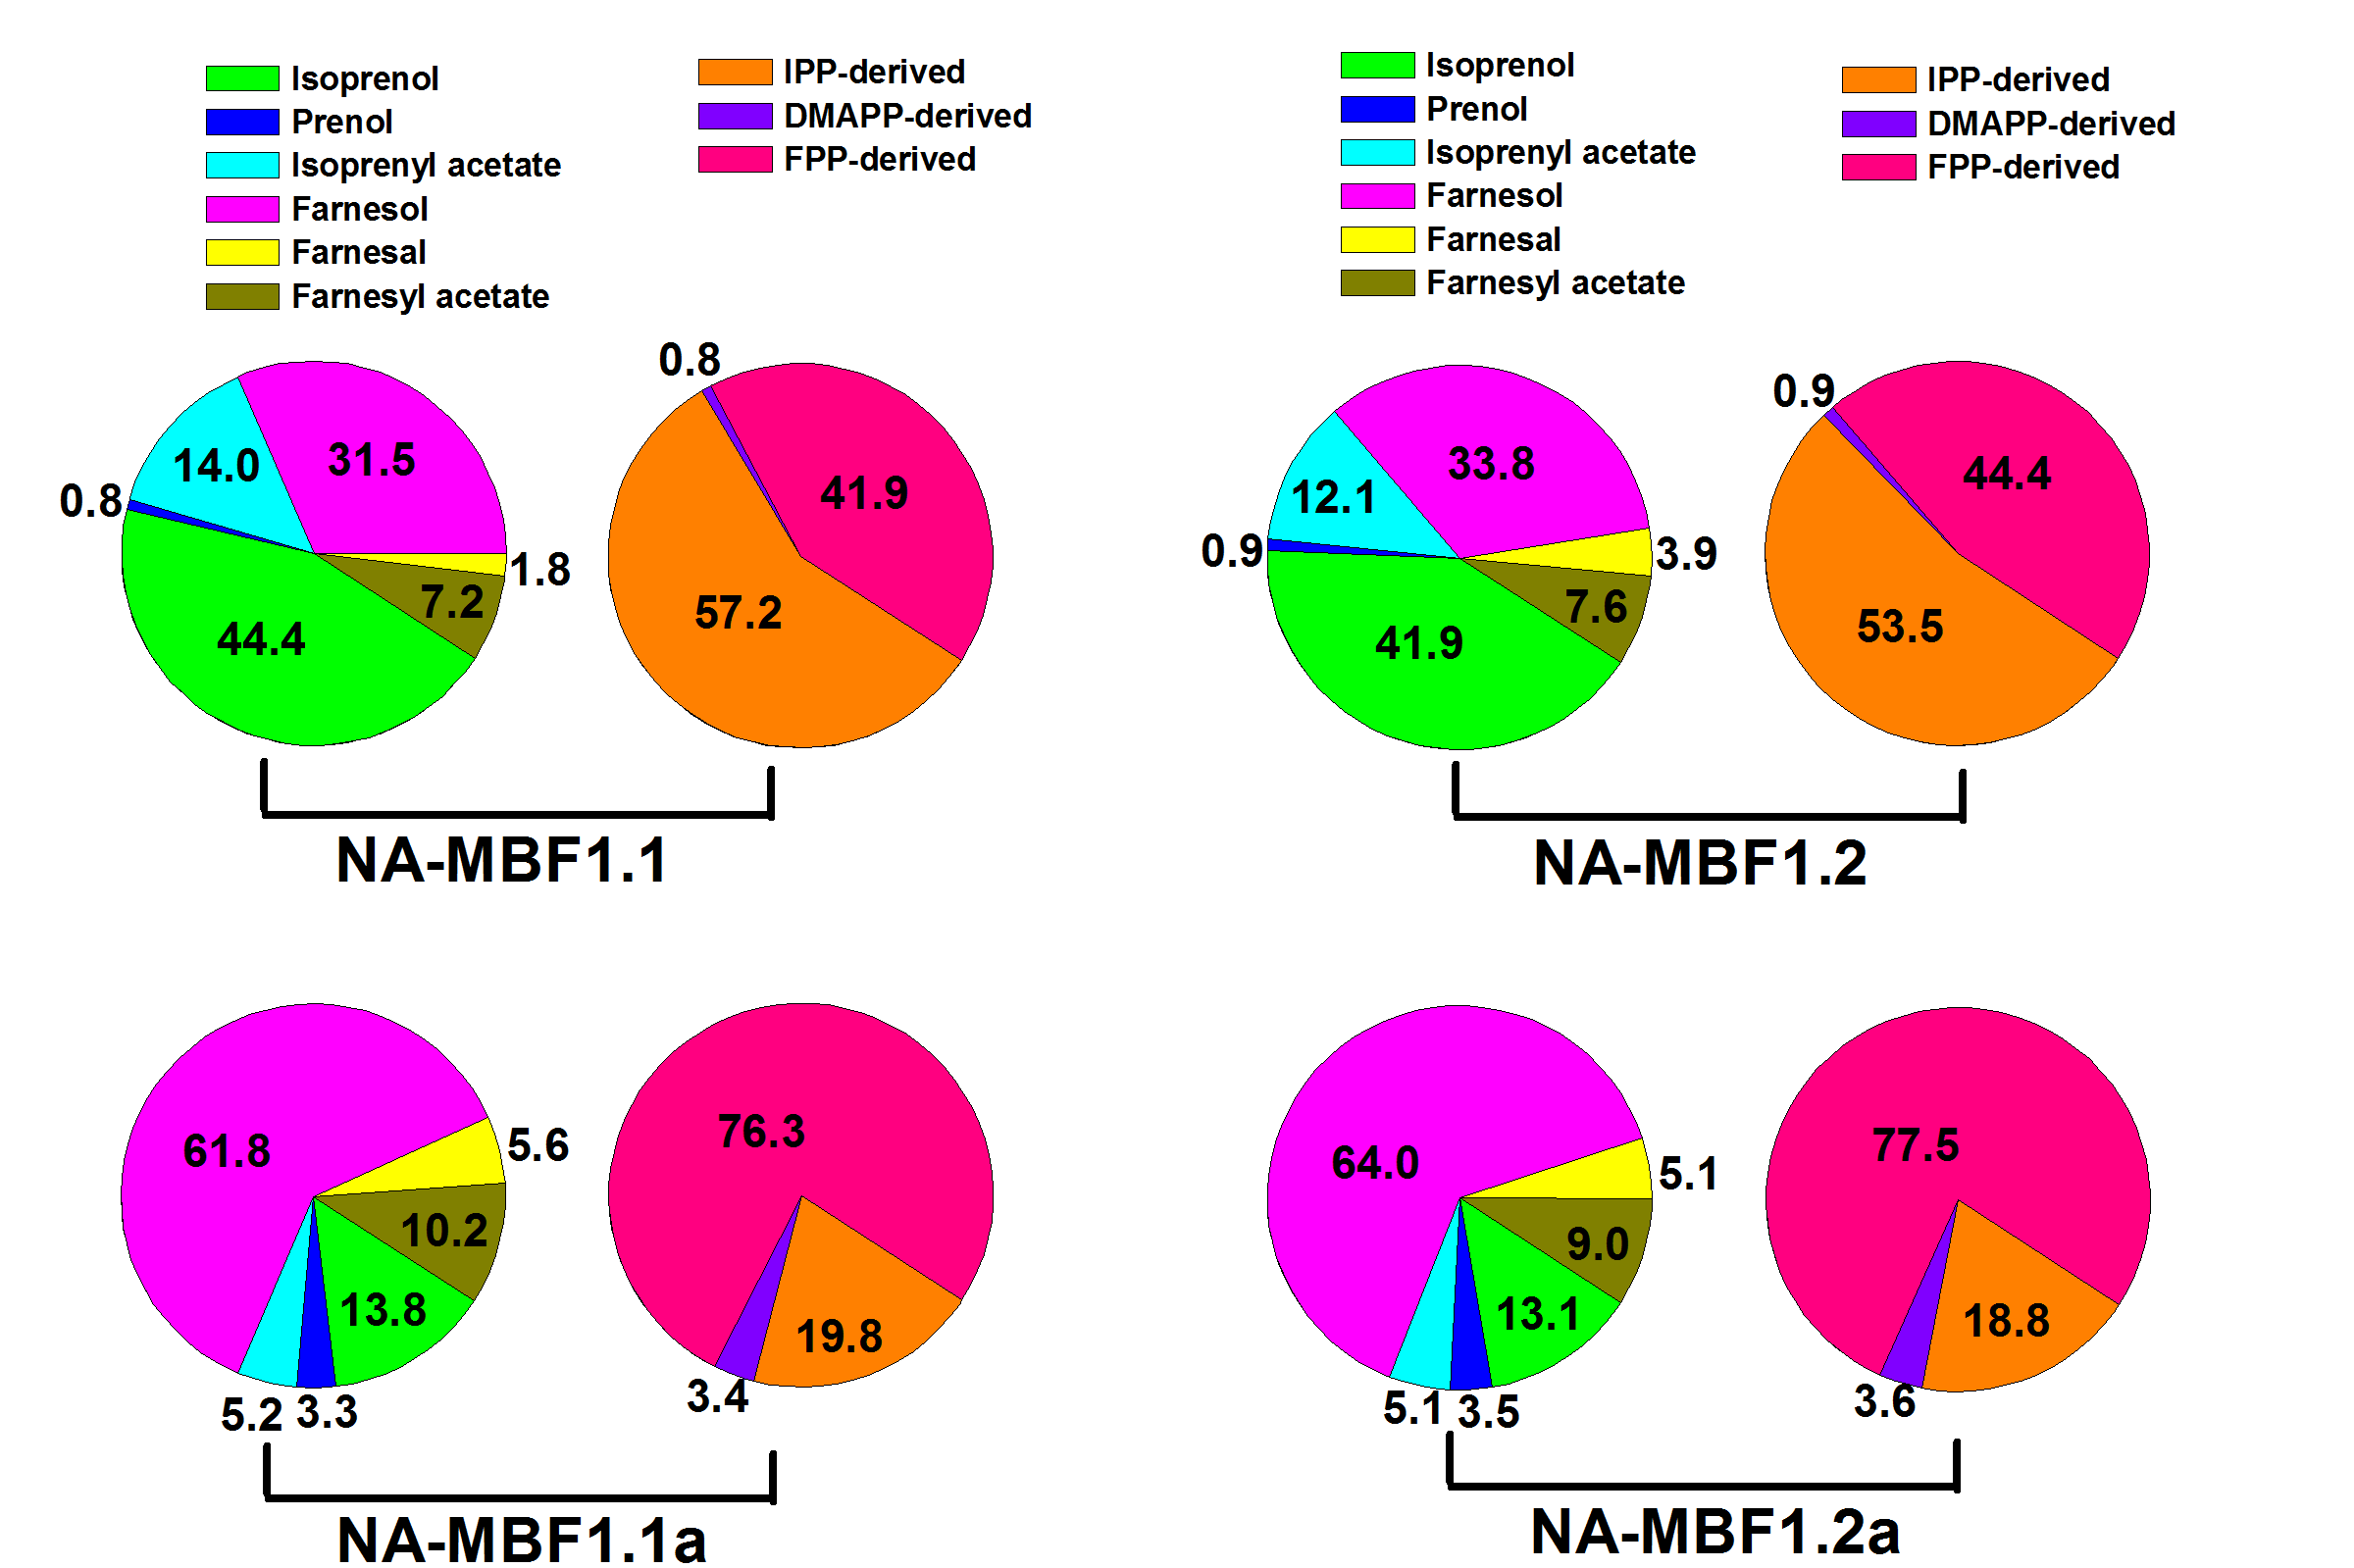
**Percent composition of isoprenoids mixtures obtained from strains NA-MBF1.1, NA-MBF1.2, NA-MBF1.1a, and NA-MBF1.2a. The strains NA-MBF1.1 and NA-MBF1.2 have no additional overexpression of IDI, while the strains NA-MBF1.1a and NA-MBF1.2a have additional overexpression of IDI. Strains were cultured at 30°C for 48 h in 2YT medium containing 2.0% (v/v) glycerol and were initially induced with 0.5 mM IPTG.

**
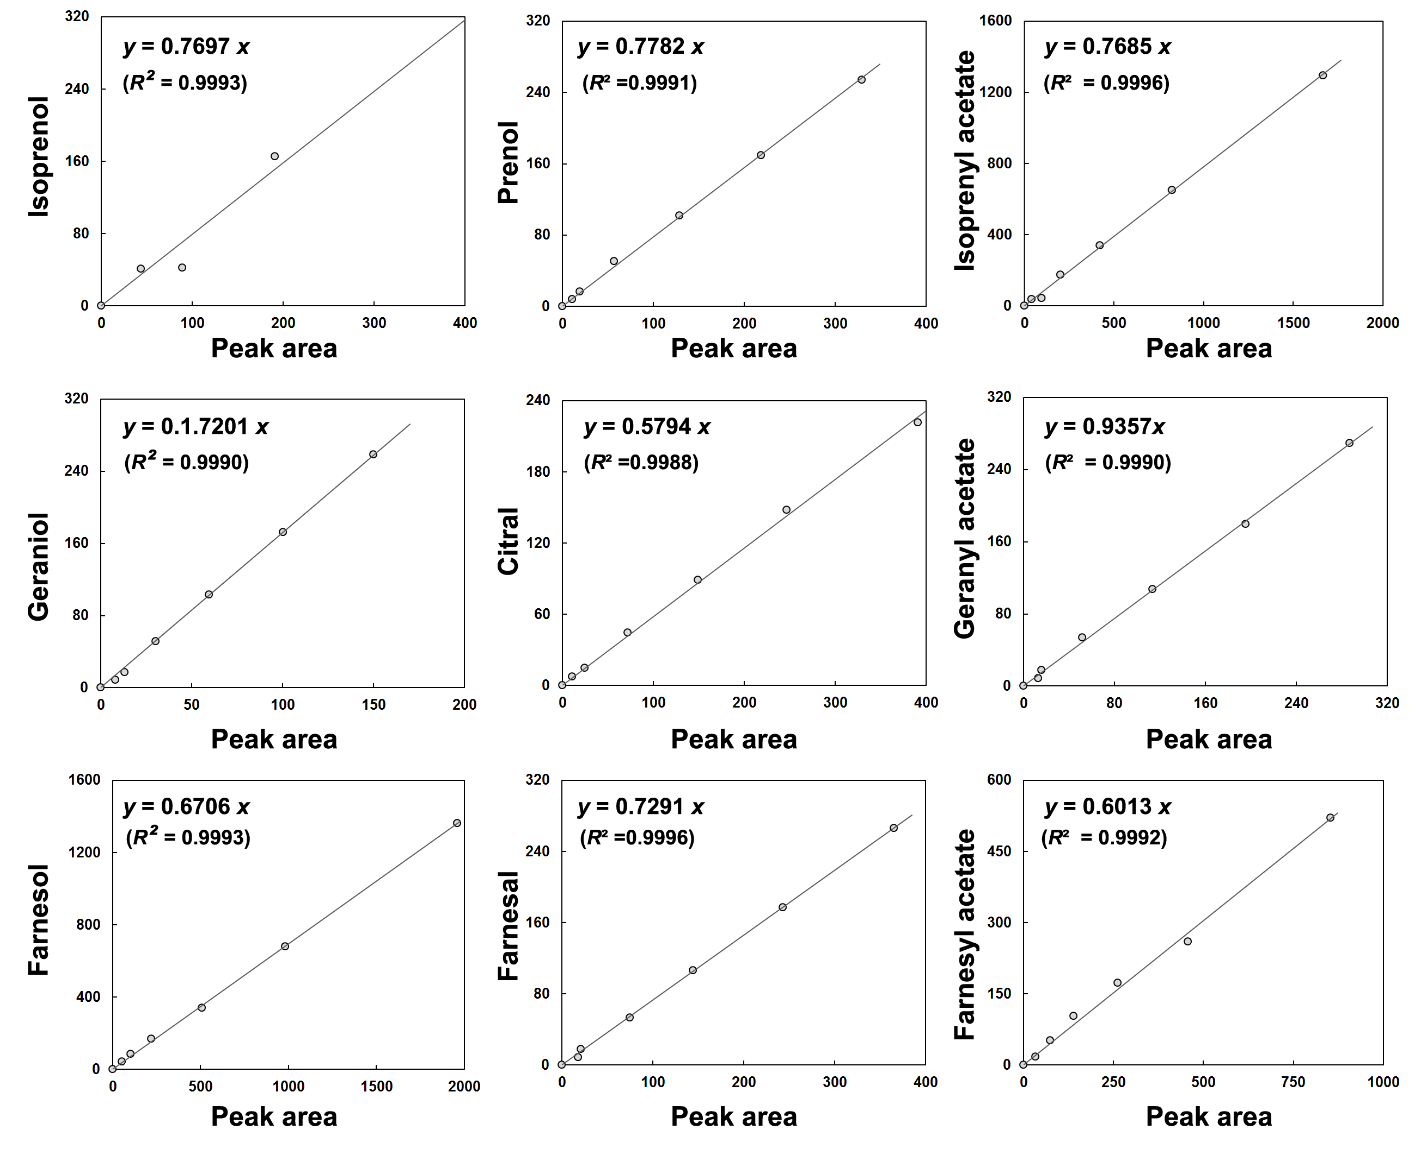
**

**Figure S5.**

**GC-FID standard curves of isoprenoid alcohols and their derivatives.** All standard curves were generated using the means of three replicated experiments. The x-axis represents the GC peak area of the isoprenoids, while the y-axis represents the concentration of the corresponding standard compound in ethyl acetate.

**References**

1. Yoon SH, Lee SH, Das A, Ryu HK, Jang HJ, Kim JY, Oh DK, Keasling JD, Kim SW: **Combinatorial expression of bacterial whole mevalonate pathway for the production of beta-carotene in *E. coli***. *Journal of biotechnology* 2009, **140**(3-4):218-226.

2. Zhou J, Wang C, Yoon SH, Jang HJ, Choi ES, Kim SW: **Engineering *Escherichia coli* for selective geraniol production with minimized endogenous dehydrogenation**. *Journal of biotechnology* 2014, **169**:42-50.

3. Amann E, Ochs B, Abel KJ: **Tightly regulated tac promoter vectors useful for the expression of unfused and fused proteins in *Escherichia coli***. *Gene* 1988, **69**(2):301-315.
